# Supplementary material for: Metabolome Profiling Supports the Key Role of the Spike in Wheat Yield Performance
Source: PubMed Central journal article supplement (PMC7226616; doi:10.3390/cells9041025), 2020-04-21
Supplement: cells-09-01025-s001.pdf [file cells-09-01025-s001.pdf]

## Metabolome Profiling Supports the Key Role of the Spike in Wheat Yield Performance

### Supplementary Materials

#### Tables

**Table S1. Information on the durum wheat cultivars tested. Year of release, country of registration, pedigree or cross name, breeder and use recommendation.**

| Cultivar       | Year | Country | Pedigree/cross name                                                       | Breeder                  | Recommended use    |
|----------------|------|---------|---------------------------------------------------------------------------|--------------------------|--------------------|
| Sula*          | 1994 | Spain   | Shearwater(SIB)/(SIB)Redneck//(SIB)Yavaros                                | CIMMYT                   | all cereal areas   |
| Dorondon       | 1999 | Spain   | cross between Fs selected material                                        | Genética y Gestión, S.C. | rainfed cold areas |
| Pelayo+        | 2003 | Spain   | Capeiti-8/Valnova (Eiti 6/Cappelli //Giorgio 324//Senatore Cappelli/Yuma) | Agrosa SA                | cold areas         |
| Don Sebastian* | 2004 | Spain   | Zegzag-1/Lunde-5//Greenshank-32                                           | Agroveget al-CIMMYT      | rainfed areas      |
| Kiko Nick*     | 2009 | Spain   | SEL.CIMMYT-35/Durango//Isea-1938/Grazia                                   | Limagrain Europe         | all cereal areas   |

\* bred either at CIMMYT or with a CIMMYT parent

+ Italian parents

**Table S2. Metabolite content change (log<sub>2</sub>-fold change) between the Zamadueñas rainfed and Zamadueñas irrigated trials at anthesis stage. Blue is indicative of increasing metabolite under WS environment. \*, p-value < 0.05; \*\*, p-value < 0.01; \*\*\*, p-value < 0.001; ns, non-significant.**

|                         | Leaves   | Lemmas  | Glumes   |
|-------------------------|----------|---------|----------|
| 5-oxoproline            | 0.45**   | 0.51**  | 0.22ns   |
| Ala                     | -0.41*** | 0.20*   | 0.36*    |
| Arg                     | 0.38**   |         | 0.18ns   |
| Asn                     | -0.70*   | -0.28ns | 0.24ns   |
| Asp                     | 0.22ns   | 2.09*** | 1.89***  |
| β-Ala                   | -0.34ns  | 0.21ns  | 0.39*    |
| GABA                    | 0.16ns   | 0.09ns  | -0.05ns  |
| Gln                     | 0.22ns   | 0.60*   | 0.10ns   |
| Glu                     | 1.93**   | 1.15**  | 1.25**   |
| His                     | 0.31ns   | 0.57ns  | 0.05ns   |
| Hse                     |          |         | 0.32ns   |
| Hyp                     | 1.29***  | 1.00*** | 1.20***  |
| Ile                     | -0.26ns  | 1.38*** | 0.85***  |
| Lys                     | 0.15ns   | 0.23ns  | -0.03ns  |
| Met                     | -0.22ns  | 0.60*   | 0.33ns   |
| N-acetyl-Ser            |          |         | -0.71*** |
| O-acetyl-Ser            |          |         | -0.54**  |
| Orn                     | 0.64ns   | 0.15ns  | 0.01ns   |
| Phe                     | -1.56*** | -0.08ns | -0.02ns  |
| Pro                     | 4.56***  | 3.09*** | 2.45***  |
| Thr                     | 0.02ns   | 0.73*** | 0.44***  |
| Trp                     | -0.28ns  | -0.31*  | -0.19ns  |
| Tyr                     | -1.44*** | 0.20ns  | 0.11ns   |
| tyramine                | -0.23ns  | 0.14ns  | -0.06ns  |
| Val                     | -0.06ns  | 1.47*** | 1.00***  |
| 3-hydroxypyridine       | -0.33**  | -0.09ns | 0.59*    |
| 4-hydroxybenzoate       |          | 0.29ns  | 0.44ns   |
| 4-hydroxypyridine       | -0.30*   | 0.00ns  | 0.35ns   |
| benzoate                | -0.35*   | 0.13ns  | -0.02ns  |
| lactate                 | -0.29ns  | -0.22ns |          |
| maleate                 | -0.29ns  | 0.12ns  | 0.11ns   |
| putrescine              | 0.29ns   | -0.20ns | -0.19ns  |
| DHA                     | -0.13ns  | 0.27*   | 0.05ns   |
| galactonate-1,4-lactone |          |         | 0.55***  |
| glucarate-1,4-lactone   | 1.43***  |         | 1.02***  |
| threonate               | -0.44*** | -0.02ns | 0.13ns   |
| erythrose               | 0.46ns   | 0.69**  | ns       |
| Fru                     | 1.02***  | 0.72*** | 0.88***  |
| galactinol              | -0.64*** | -0.05ns | -0.19ns  |
| Glc                     | 1.18***  | 1.22*** | 1.22***  |

continued

|                           | Leaves   | Lemmas   | Glumes   |
|---------------------------|----------|----------|----------|
| glycerol                  | -1.05*** | -0.23*   | -0.29**  |
| glycerol-3P               |          | 1.26***  | 1.27***  |
| isomaltose                |          | 0.82***  | 0.94***  |
| maltose                   | 0.28ns   | 0.52*    | 0.95ns   |
| myo-inositol              | -0.13ns  | 0.00ns   | -0.02ns  |
| myoinositol-1-P           | -0.12ns  | 0.31ns   | 0.05ns   |
| Raf                       | -0.74ns  | 0.51ns   | 0.75*    |
| Suc                       | 0.80***  | 1.04***  | 1.15***  |
| trehalose                 | 0.19ns   | 0.52***  | 0.90***  |
| cellobiose                |          |          | 0.90***  |
| fucose                    | -0.80*** | -0.19*   | 0.01ns   |
| rhamnose                  | 0.25ns   |          | 0.43***  |
| xylose                    | -0.34*   | -0.32*** | -0.24*   |
| Adenine                   | -0.60ns  | 0.17ns   | -0.56ns  |
| AMP                       | 0.76ns   | 0.75*    | 0.23ns   |
| guanidine                 | -0.85ns  | -0.55ns  | -1.54ns  |
| nicotinate                | -0.47**  | -0.14ns  | -0.05ns  |
| phosphate                 | 0.03ns   | -0.16ns  | 0.06ns   |
| uracil                    | -1.15*** | -0.16ns  | -0.06ns  |
| 3-cis-CQA                 | -0.25ns  |          |          |
| 3-trans-CQA               | -0.14ns  |          |          |
| 4-hydroxy-trans-cinnamate | 0.31ns   | 0.27ns   | 0.00ns   |
| quinic acid               | -0.24ns  |          |          |
| trans-caffeate            | -0.14ns  |          |          |
| Gly                       | -0.38*   | 0.38ns   | 0.52ns   |
| glycerate                 | -0.33**  | 0.14ns   | 0.14ns   |
| glycolate                 | -0.28*   | 0.02ns   | 0.20*    |
| Ser                       | 0.21ns   | 0.67***  | 0.79***  |
| 2OG                       | 0.33ns   | 0.07ns   | 0.14ns   |
| citrate                   |          | -2.04*** | -2.43*** |
| fumarate                  | -0.33ns  | 0.07ns   | 0.64**   |
| isocitrate                |          | -0.28ns  | -0.33ns  |
| malate                    | -0.37ns  | 0.79***  | 0.87*    |
| pyruvate                  | -0.67**  | 0.34ns   | 0.01ns   |
| succinate                 | -0.43*** | -0.28*   | -0.18ns  |

**Table S3. Differences in the relative content of metabolites between growing conditions in leaves, lemmas and glumes at anthesis and grain filling expressed as log<sub>2</sub>-fold change (log<sub>2</sub>-FC) together with the corresponding statistical significance (p-value). Positive log<sub>2</sub>-FC values indicate higher relative content under water stress conditions and negative log<sub>2</sub>-FC values indicate higher content under high yielding conditions.**

|                         | Anthesis             |         |                      |         |                      |         | Grain filling        |         |                      |         |                      |         |
|-------------------------|----------------------|---------|----------------------|---------|----------------------|---------|----------------------|---------|----------------------|---------|----------------------|---------|
|                         | Leaf                 |         | Lemma                |         | Glume                |         | Leaf                 |         | Lemma                |         | Glume                |         |
|                         | log <sub>2</sub> -FC | p-value | log <sub>2</sub> -FC | p-value | log <sub>2</sub> -FC | p-value | log <sub>2</sub> -FC | p-value | log <sub>2</sub> -FC | p-value | log <sub>2</sub> -FC | p-value |
| Carbon metabolism       |                      |         |                      |         |                      |         |                      |         |                      |         |                      |         |
| Fru                     | 1.31                 | 0.000   | 0.56                 | 0.000   | 0.95                 | 0.000   | 0.35                 | 0.053   | 0.48                 | 0.006   | 0.55                 | 0.028   |
| Glc                     | 1.37                 | 0.000   | 0.85                 | 0.000   | 0.84                 | 0.000   | 0.17                 | 0.307   | 0.54                 | 0.002   | 0.59                 | 0.034   |
| Suc                     | 0.36                 | 0.016   | 0.37                 | 0.011   | 0.39                 | 0.014   | 0.12                 | 0.631   | 0.09                 | 0.506   | 0.23                 | 0.064   |
| raffinose               | -1.68                | 0.164   | 0.65                 | 0.003   | 0.58                 | 0.008   | 0.12                 | 0.591   | 0.50                 | 0.351   | 0.15                 | 0.549   |
| isomaltose              | -                    | -       | 0.80                 | 0.000   | 0.88                 | 0.000   | -                    | -       | 0.05                 | 0.673   | 0.04                 | 0.835   |
| maltose                 | -0.28                | 0.075   | 0.28                 | 0.254   | 0.53                 | 0.026   | -0.33                | 0.026   | -0.10                | 0.660   | -0.10                | 0.573   |
| glycerol                | -0.25                | 0.225   | 0.14                 | 0.220   | 0.06                 | 0.553   | -0.17                | 0.583   | -0.13                | 0.491   | -0.40                | 0.076   |
| galactinol              | -0.57                | 0.005   | -0.66                | 0.000   | -0.67                | 0.000   | -0.09                | 0.553   | -0.84                | 0.000   | -0.39                | 0.007   |
| trehalose               | -0.05                | 0.072   | 0.19                 | 0.114   | 0.50                 | 0.002   | -0.30                | 0.019   | -0.76                | 0.000   | -0.29                | 0.064   |
| erythrose               | 0.76                 | 0.046   | 0.56                 | 0.148   | -0.42                | 0.654   | 0.75                 | 0.002   | -0.08                | 0.816   | -                    | -       |
| <i>myo</i> -inositol    | -0.21                | 0.016   | -0.31                | 0.000   | -0.14                | 0.068   | 0.08                 | 0.448   | 0.21                 | 0.381   | 0.02                 | 0.922   |
| <i>myo</i> inositol-1-P | -0.33                | 0.001   | -0.25                | 0.132   | -0.08                | 0.566   | -                    | -       | -0.11                | 0.461   | -0.36                | 0.061   |
| glycerol-3P             | -                    | -       | 0.95                 | 0.008   | 0.99                 | 0.008   | -                    | -       | -                    | -       | -0.38                | 0.526   |
| Amino acid metabolism   |                      |         |                      |         |                      |         |                      |         |                      |         |                      |         |
| Hyp                     | 0.80                 | 0.001   | 0.65                 | 0.000   | 1.07                 | 0.000   | 0.47                 | 0.066   | 0.57                 | 0.003   | 0.52                 | 0.037   |
| Ala                     | -0.15                | 0.047   | 0.43                 | 0.000   | 0.51                 | 0.002   | -0.07                | 0.669   | -0.06                | 0.699   | -0.06                | 0.570   |
| Asn                     | -0.74                | 0.001   | 0.43                 | 0.117   | 0.35                 | 0.168   | -0.26                | 0.409   | 0.26                 | 0.612   | 0.17                 | 0.690   |
| Asp                     | -0.18                | 0.115   | 1.27                 | 0.000   | 1.34                 | 0.000   | 0.52                 | 0.208   | 1.15                 | 0.000   | 1.01                 | 0.001   |
| b-Ala                   | -0.08                | 0.512   | 0.25                 | 0.038   | 0.39                 | 0.004   | 0.59                 | 0.001   | 0.31                 | 0.059   | 0.07                 | 0.648   |
| Glu                     | -0.63                | 0.149   | 0.42                 | 0.144   | 0.74                 | 0.006   | 0.44                 | 0.146   | 0.76                 | 0.016   | 0.57                 | 0.012   |
| Gln                     | -0.20                | 0.437   | 0.81                 | 0.005   | 0.44                 | 0.007   | -0.24                | 0.648   | 0.54                 | 0.194   | 0.62                 | 0.423   |
| His                     | 0.82                 | 0.126   | 0.94                 | 0.001   | 0.64                 | 0.004   | 0.13                 | 0.751   | 0.74                 | 0.166   | 0.60                 | 0.298   |
| Ile                     | 0.38                 | 0.156   | 1.49                 | 0.000   | 1.00                 | 0.000   | 0.12                 | 0.735   | 0.75                 | 0.015   | 0.70                 | 0.056   |
| Lys                     | 0.88                 | 0.004   | 0.94                 | 0.002   | 0.76                 | 0.001   | 0.29                 | 0.212   | 1.13                 | 0.037   | 0.44                 | 0.409   |
| Met                     | 0.44                 | 0.276   | 0.69                 | 0.001   | 0.55                 | 0.004   | -0.07                | 0.872   | 0.67                 | 0.146   | 0.93                 | 0.103   |
| Orn                     | 0.86                 | 0.157   | 1.04                 | 0.015   | 0.89                 | 0.001   | 0.16                 | 0.868   | 1.06                 | 0.073   | 0.46                 | 0.456   |
| Phe                     | -0.13                | 0.630   | 0.21                 | 0.139   | 0.43                 | 0.035   | 0.11                 | 0.772   | 0.06                 | 0.824   | 0.27                 | 0.527   |
| Pro                     | 2.98                 | 0.028   | 2.96                 | 0.000   | 2.47                 | 0.000   | 1.33                 | 0.069   | 1.27                 | 0.005   | 1.19                 | 0.011   |
| 5-oxoproline            | -0.20                | 0.225   | 0.68                 | 0.001   | 0.65                 | 0.004   | 0.07                 | 0.691   | 0.23                 | 0.428   | 0.18                 | 0.622   |
| Thr                     | -0.14                | 0.104   | 0.83                 | 0.000   | 0.51                 | 0.000   | 0.16                 | 0.344   | 0.49                 | 0.016   | 0.40                 | 0.052   |
| Trp                     | 0.22                 | 0.187   | 0.33                 | 0.006   | 0.31                 | 0.012   | 0.42                 | 0.005   | -0.26                | 0.026   | -0.25                | 0.045   |
| tyramine                | 0.07                 | 0.181   | -0.04                | 0.941   | -0.11                | 0.358   | 0.67                 | 0.015   | -0.01                | 0.938   | -0.07                | 0.615   |
| Tyr                     | -0.03                | 0.255   | 0.22                 | 0.185   | 0.44                 | 0.017   | 0.17                 | 0.502   | 0.05                 | 0.856   | -0.03                | 0.934   |
| Val                     | 0.38                 | 0.067   | 1.63                 | 0.000   | 1.12                 | 0.000   | 0.08                 | 0.803   | 0.76                 | 0.011   | 0.68                 | 0.085   |
| GABA                    | 0.06                 | 0.663   | 0.20                 | 0.049   | 0.27                 | 0.015   | 0.38                 | 0.117   | 0.08                 | 0.707   | 0.03                 | 0.870   |
| Arg                     | 0.82                 | 0.018   | -                    | -       | 0.56                 | 0.000   | 0.42                 | 0.135   | 0.99                 | 0.045   | 0.88                 | 0.147   |
| Hse                     | -                    | -       | -                    | -       | 0.58                 | 0.002   | -                    | -       | -                    | -       | -                    | -       |

|                           |       |       |       |       |       |       |       |       |       |       |       |       |
|---------------------------|-------|-------|-------|-------|-------|-------|-------|-------|-------|-------|-------|-------|
| N-acetyl-Ser              | -     | -     | -     | -     | 0.07  | 0.616 | -     | -     | -     | -     | -     | -     |
| O-acetyl-Ser              | -     | -     | -     | -     | -0.05 | 0.815 | -     | -     | -     | -     | -     | -     |
| Photorespiration          |       |       |       |       |       |       |       |       |       |       |       |       |
| glycerate                 | -0.54 | 0.003 | 0.10  | 0.196 | 0.20  | 0.014 | -0.38 | 0.154 | 0.06  | 0.770 | -0.10 | 0.502 |
| glycolate                 | -0.21 | 0.026 | 0.18  | 0.022 | 0.12  | 0.118 | 0.04  | 0.838 | 0.04  | 0.748 | -0.14 | 0.461 |
| Gly                       | -0.34 | 0.121 | 0.37  | 0.533 | 0.84  | 0.006 | -0.44 | 0.030 | 0.44  | 0.055 | 0.33  | 0.263 |
| Ser                       | -0.43 | 0.002 | 0.78  | 0.000 | 0.78  | 0.000 | -0.04 | 0.863 | 0.36  | 0.181 | 0.33  | 0.249 |
| Respiration               |       |       |       |       |       |       |       |       |       |       |       |       |
| 2OG                       | -2.56 | 0.015 | -0.48 | 0.077 | -0.08 | 0.789 | -0.74 | 0.543 | 0.01  | 0.915 | 0.75  | 0.098 |
| citrate                   | 0.45  | 0.003 | -0.32 | 0.316 | 0.00  | 0.990 | -0.18 | 0.459 | 0.32  | 0.144 | 0.42  | 0.034 |
| fumarate                  | -0.30 | 0.005 | -0.15 | 0.398 | 0.38  | 0.017 | 0.08  | 0.696 | 0.33  | 0.260 | 0.33  | 0.204 |
| isocitrate                | -0.33 | 0.478 | 0.71  | 0.012 | 0.52  | 0.055 | -0.22 | 0.209 | 0.35  | 0.163 | 0.14  | 0.492 |
| MALATE                    | -0.88 | 0.145 | 0.59  | 0.000 | 0.99  | 0.000 | 0.00  | 0.979 | 1.15  | 0.320 | -0.94 | 0.007 |
| pyruvate                  | -0.92 | 0.023 | 0.14  | 0.508 | -0.02 | 0.868 | -0.44 | 0.050 | 0.26  | 0.563 | 0.53  | 0.230 |
| succinate                 | -0.54 | 0.000 | -0.18 | 0.040 | 0.08  | 0.409 | -0.14 | 0.339 | 0.05  | 0.815 | -0.03 | 0.866 |
| Cell Wall                 |       |       |       |       |       |       |       |       |       |       |       |       |
| cellobiose                | -     | -     | -     | -     | 0.50  | 0.000 | -     | -     | -     | -     | -0.05 | 0.859 |
| fucose                    | -0.65 | 0.001 | -0.35 | 0.003 | -0.06 | 0.446 | -0.45 | 0.000 | -     | -     | -0.68 | 0.000 |
| xylose                    | 0.00  | 0.994 | -0.08 | 0.571 | 0.02  | 0.893 | -0.14 | 0.366 | -0.02 | 0.848 | -0.21 | 0.022 |
| rhamnose                  | 0.45  | 0.000 | -     | -     | 0.61  | 0.000 | 0.42  | 0.000 | -     | -     | 0.13  | 0.269 |
| Energy & Nucleic          |       |       |       |       |       |       |       |       |       |       |       |       |
| AMP                       | 0.86  | 0.037 | 0.58  | 0.005 | 0.15  | 0.270 | -     | -     | -     | -     | 0.14  | 0.630 |
| nicotinate                | 0.34  | 0.064 | 0.65  | 0.027 | 0.41  | 0.033 | 0.02  | 0.897 | 0.16  | 0.344 | -0.22 | 0.044 |
| guanidine                 | -1.87 | 0.137 | 0.37  | 0.266 | -1.12 | 0.340 | 0.64  | 0.156 | 0.23  | 0.353 | 0.05  | 1.000 |
| Adenine                   | 0.22  | 0.623 | 1.06  | 0.019 | 1.41  | 0.032 | -     | -     | 0.01  | 0.992 | -     | -     |
| uracil                    | -0.48 | 0.019 | 0.16  | 0.263 | 0.15  | 0.314 | 0.23  | 0.447 | 0.80  | 0.004 | 0.09  | 0.758 |
| phosphate                 | -1.20 | 0.002 | -0.49 | 0.039 | -0.19 | 0.372 | -0.72 | 0.028 | -0.11 | 0.842 | -0.69 | 0.078 |
| Ascorbate metabolism      |       |       |       |       |       |       |       |       |       |       |       |       |
| DHA                       | 0.22  | 0.124 | 0.10  | 0.414 | -0.02 | 0.617 | 0.17  | 0.314 | 0.07  | 0.633 | 0.19  | 0.163 |
| glucarate-1,4-lactone     | 1.53  | 0.000 | -     | -     | 0.74  | 0.000 | -     | -     | -     | -     | 0.81  | 0.025 |
| galactonate-1,4-lactone   | -     | -     | -     | -     | 0.38  | 0.000 | -     | -     | -     | -     | 0.04  | 0.759 |
| threonate                 | -0.30 | 0.000 | 0.19  | 0.062 | 0.29  | 0.001 | 0.04  | 0.704 | 0.02  | 0.907 | -0.11 | 0.227 |
| Phenylpropanoids          |       |       |       |       |       |       |       |       |       |       |       |       |
| 4-hydroxy-trans-cinnamate | 0.51  | 0.138 | 0.14  | 0.340 | 0.12  | 0.432 | 0.02  | 0.943 | -0.16 | 0.397 | -0.36 | 0.067 |
| 3-cis-CQA                 | -1.03 | 0.007 | -     | -     | -     | -     | 0.07  | 0.966 | -     | -     | -     | -     |
| 3-trans-CQA               | -0.80 | 0.088 | -     | -     | -     | -     | -0.16 | 0.811 | -     | -     | -     | -     |
| trans-caffeate            | -0.31 | 0.008 | -     | -     | -     | -     | -0.02 | 0.808 | -     | -     | -     | -     |
| quinic acid               | -0.95 | 0.001 | -0.90 | 0.002 | -0.62 | 0.101 | -0.74 | 0.026 | -0.33 | 0.157 | -0.85 | 0.002 |
| Aromatics & Other         |       |       |       |       |       |       |       |       |       |       |       |       |
| 4-hydroxybenzoate         | -     | -     | 0.41  | 0.006 | 0.72  | 0.001 | -     | -     | 0.26  | 0.103 | -0.04 | 0.874 |
| benzoate                  | -0.12 | 0.202 | 0.20  | 0.033 | 0.26  | 0.006 | 0.09  | 0.498 | 0.14  | 0.259 | -0.40 | 0.018 |
| 3-hydroxypyridine         | -0.39 | 0.000 | 0.13  | 0.347 | 0.60  | 0.000 | -0.20 | 0.237 | -     | -     | -0.13 | 0.404 |
| 4-hydroxypyridine         | -0.39 | 0.034 | 0.03  | 0.819 | 0.29  | 0.037 | -0.24 | 0.214 | -0.08 | 0.544 | -0.10 | 0.627 |
| lactate                   | -0.33 | 0.059 | -0.23 | 0.032 | -     | -     | -0.28 | 0.092 | -0.50 | 0.119 | -0.25 | 0.468 |
| malonate                  | -     | -     | -     | -     | -     | -     | -     | -     | -     | -     | -0.93 | 0.000 |
| salicylate                | -     | -     | -     | -     | -     | -     | 0.07  | 0.609 | -     | -     | -0.09 | 0.160 |
| putrescine                | 0.46  | 0.013 | -0.28 | 0.110 | -0.14 | 0.513 | 0.09  | 0.711 | -     | -     | 0.84  | 0.340 |
| maleate                   | -0.22 | 0.512 | 0.33  | 0.094 | 3.92  | 0.482 | 0.16  | 0.590 | 0.33  | 0.260 | -0.94 | 0.014 |

## Figures

**Figure S1. Mean values of grain yield in a collection of twenty post-green revolution durum wheat genotypes under high yielding (HY) and water stress (WS) conditions as indicated in the Materials and Methods. Red bars correspond to the five selected genotypes in this study.**

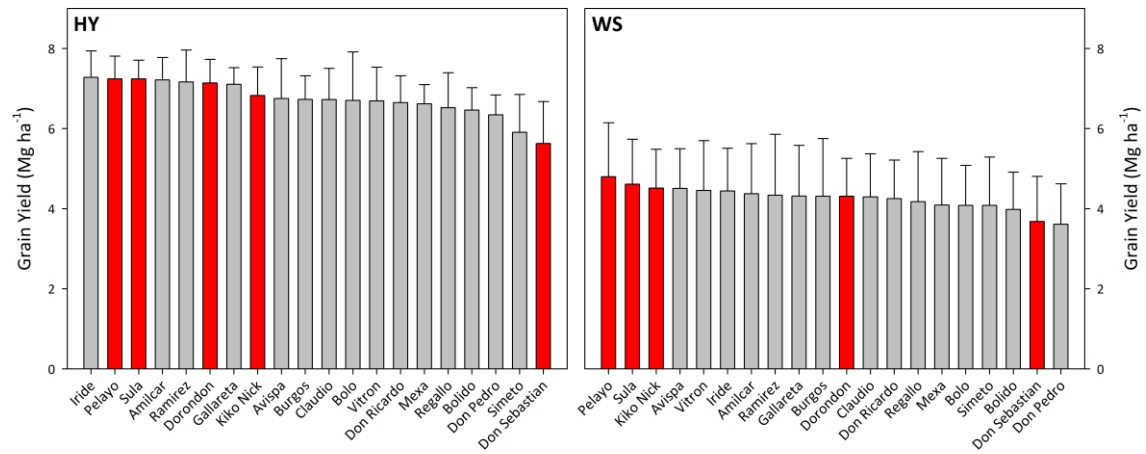

Figure S2. Heatmaps of metabolite profiles of leaves, lemmas and glumes at anthesis under high yielding (HY) and water stress (WS) conditions for each of the five tested cultivars: Pelayo, PE; Don Sebastian, DS; Dorondon, DO; Sula, SU and Kiko Nick, KN. The red-blue color scale was obtained from Z-score transformation of actual values. Grey indicates metabolites that were not detected.

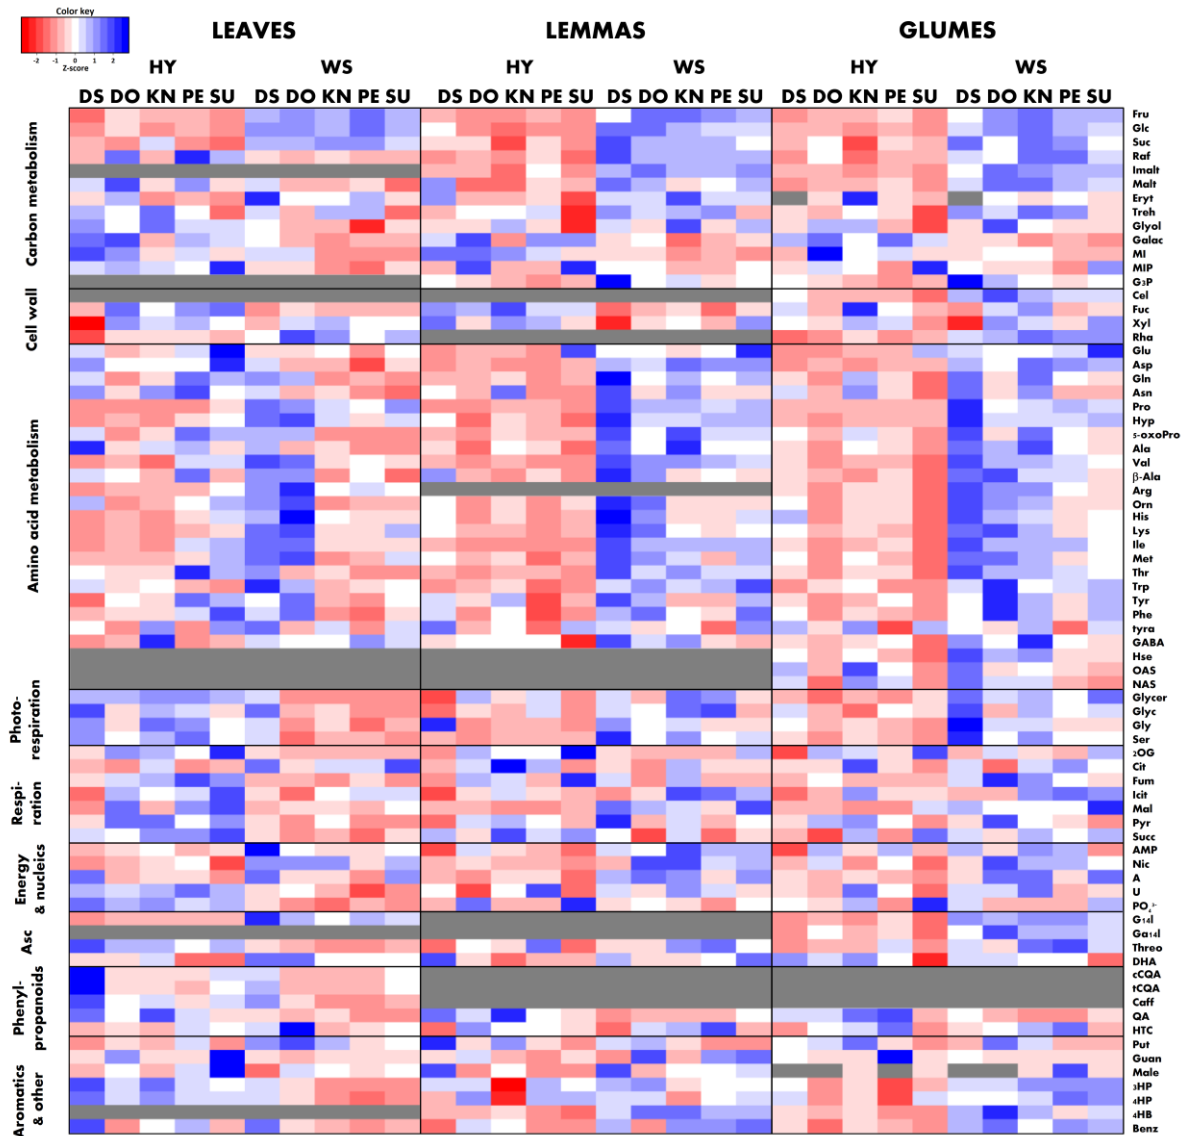

2OG, 2-oxoglutarate; cCQA, 3-cis-caffeoylquinic acid; 3HP, 3-hydroxypyridine; G3P, 3-phosphoglycerol; tCQA, 3-trans-caffeoylquinic acid; 4HB, 4-hydroxybenzoate; Hyp, 4-hydroxyproline; 4HP, 4-hydroxypyridine; 4HP, 4-hydroxypyridine; HTC, 4-hydroxy-trans-cinnamate; 5-oxoPro, 5-oxoproline; A, adenine; AMP, adenosine monophosphate; Ala, alanine; Arg, arginine; Asn, asparagine; Asp, aspartate; β-Ala, β-alanine; Benz, benzoate; BA, benzylalcohol; Cel, cellobiose; Cit, citrate; DHA, dehydroascorbate; Eryt, erythrose; Fru, fructose; Fuc, fucose; Fum, fumarate; Galac, galactinol; Galact, galactonate-1,4-lactone; GABA, γ-aminobutyric acid; Gl14l, glucarate-1,4-lactone; Glc, glucose; Glu, glutamate; Gln, glutamine; Glycer, glycerate; Glyol, glycerol; Glyc, glycine; Glyc, glycolate; Guan, guanidine; His, histidine; Hse, Homoserine; Icit, isocitrate; Ile, isoleucine; Imalt, isomaltose; Lys, lysine; Mal, malate; Male, maleate; Malt, maltose; Met, methionine; MI, myo-inositol; MIP, myoinositol-1-P; NAS, N-acetyl-Serine; Nic, nicotinate; OAS, O-acetyl-Serine; Orn, ornithine; Phe, phenylalanine; phosphate, PO<sub>4</sub><sup>3-</sup>; Pro, proline; Put, putrescine; Pyr, pyruvate; QA, quinic acid; Raf, raffinose; Rha, rhamnose; Ser, serine; Succ, succinate; Suc, sucrose; Threo, threonate; Thr, threonine; Caff, trans-cafeate; Treh, trehalose; Trp, tryptophan; Tyra, tyramine; Tyr, tyrosine; U, uracil; Val, valine; Xyl, xylose.

Figure S3. Scatter plots between grain yield and fucose (Fuc), proline (Pro) and hydroxyproline (Hyp) relative content in leaves, glumes or lemmas at anthesis and grainfilling stages. \*, p-value < 0.05; \*\*, p-value < 0.01; \*\*\*, p-value < 0.001; ns, non-significant.

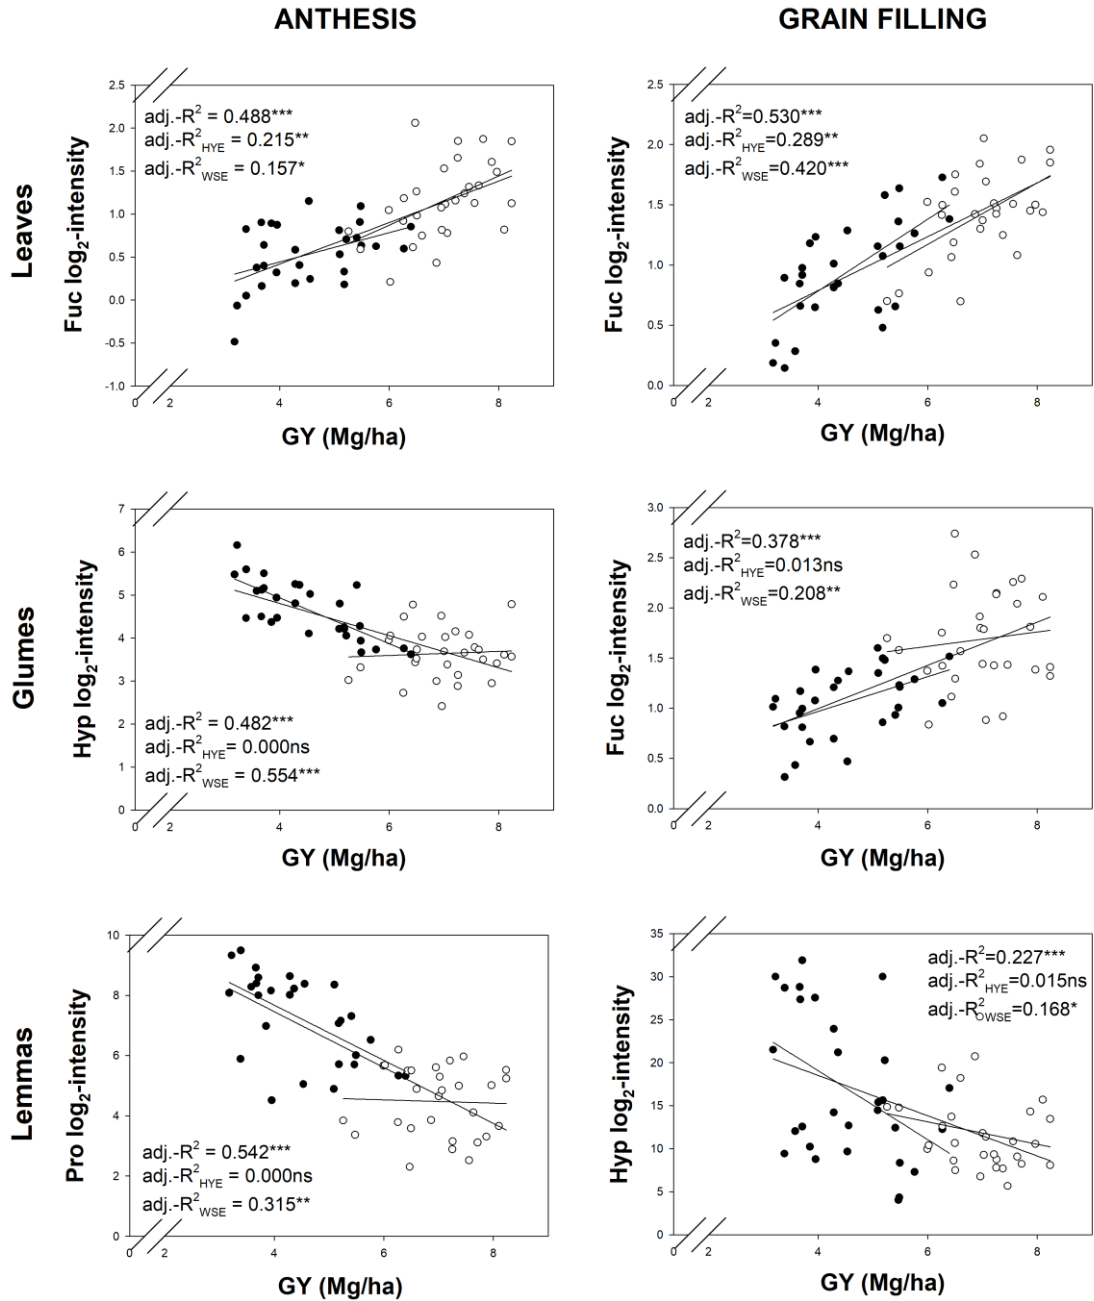



Figure S4. Correlation networks between metabolite contents and agronomic and physiological traits. The maximum alpha value was fixed at 0.001 and weaker correlations were omitted. Green lines stand for positive correlations and red lines for negative correlations. Greater line thickness indicates higher correlation coefficients.

LEAVES

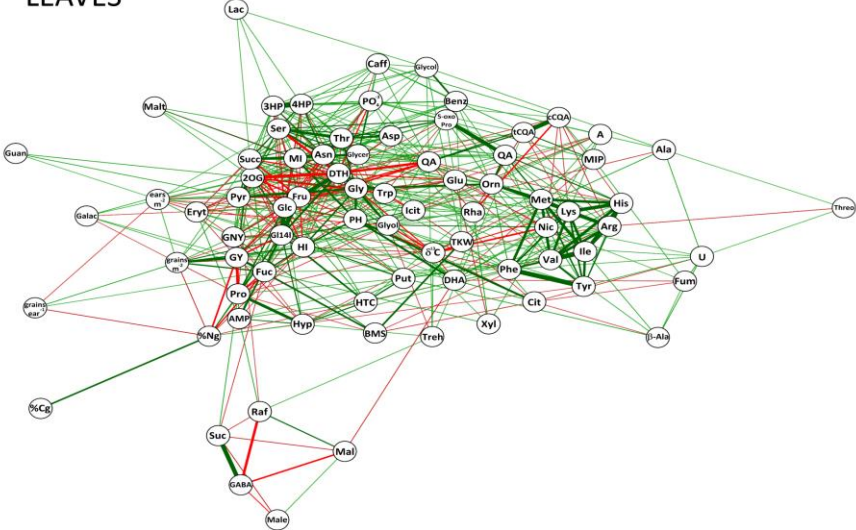

GLUMES

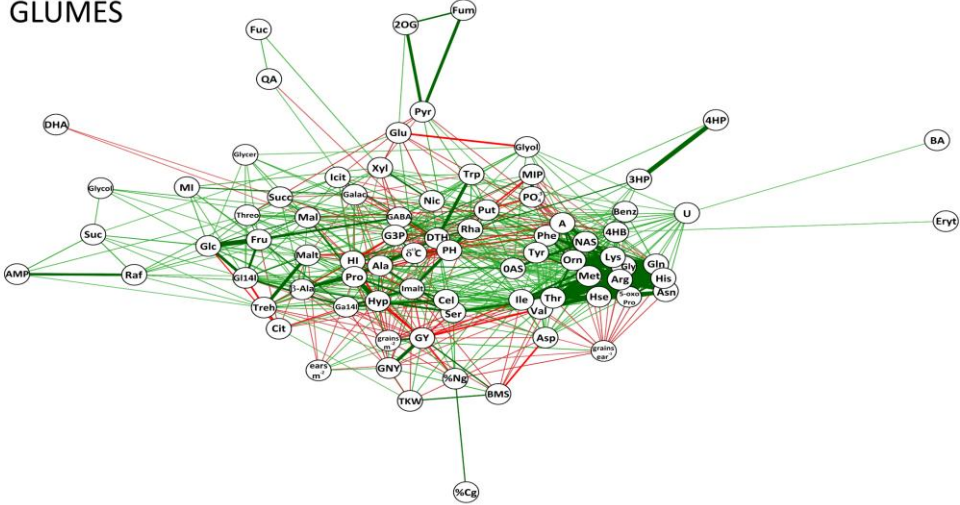

LEMMAS

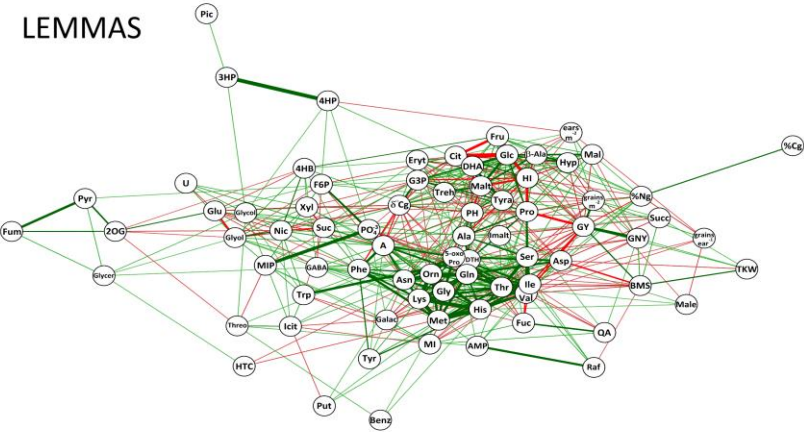

2OG, 2-oxoglutarate; cCQA, 3-cis-caffeoylquinic acid; 3HP, 3-hydroxypyridine; G3P, 3-phosphoglycerol; tCQA, 3-trans-caffeoylquinic acid; 4HB, 4-hydroxybenzoate; Hyp, 4-hydroxyproline; 4HP, 4-hydroxypyridine; 4HP, 4-hydroxypyridine; HTC, 4-hydroxy-trans-cinnamate; 5-oxoPro, 5-oxoproline; A, adenine; AMP, adenosine monophosphate; Ala, alanine; Arg, arginine; Asn, asparagine; Asp, aspartate;  $\beta$ -Ala,  $\beta$ -alanine; Benz, benzoate; BA, benzylalcohol; BMS, biomass;  $\delta^{13}\text{C}$ , carbon isotope composition; Cel, cellobiose; Cit, citrate; DTH, days to heading; DHA, dehydroascorbate; ears  $\text{m}^{-2}$ , ears per square meter; Eryt, erythrose; Fru, fructose; F6P, fructose-6-phosphate; Fuc, fucose; Fum, fumarate; Galac, galactinol; Ga14l, galactonate-1,4-lactone; GABA,  $\gamma$ -aminobutyric acid; Gl14l, glucarate-1,4-lactone; Glc, glucose; Glu, glutamate; Gln, glutamine; Glycer, glycerate; Glyol, glycerol; Gly, glycine; Glycol, glycolate; %Cg, grain carbon concentration; %Ng, grain nitrogen concentration; GNY, grain nitrogen yield; GY, grain yield; grains ear<sup>-1</sup>, grains per ear; grains  $\text{m}^{-2}$ , grains per square meter; Guan, guanidine; HI, harvest index; His, histidine; Hse, Homoserine; Icit, isocitrate; Ile, isoleucine; Imalt, isomaltose; Lac, lactate; Lys, lysine; Mal, malate; Male, maleate; Malt, maltose; Met, methionine; MI, myo-inositol; MIP, myoinositol-1-P; NAS, N-acetyl-Serine; Nic, nicotinate; OAS, O-acetyl-Serine; Orn, ornithine; Phe, phenylalanine; phosphate,  $\text{PO}_4^{3-}$ ; Pic, picolinate; PH, plant height; Pro, proline; Put, putrescine; Pyr, pyruvate; QA, quinic acid; Raf, raffinose; Rha, rhamnose; Ser, serine; Succ, succinate; Suc, sucrose; TKW, thousand kernel weight; Threo, threonate; Thr, threonine; Caff, trans-cafeate; Treh, trehalose; Trp, tryptophan; Tyra, tyramine; Tyr, tyrosine; U, uracil; Val, valine; Xyl, xylose.
